# Supplementary material
Source: PubMed Central journal article supplement (PMC6905616)
Supplement: NIHMS989391-supplement-Supp_info.pdf [file NIHMS989391-supplement-Supp_info.pdf]

Supporting Information for

## Size-dependent Tumor Response to Photodynamic Therapy and Irinotecan Monotherapies Revealed by Longitudinal Ultrasound Monitoring in an Orthotopic Pancreatic Cancer Model

Michael Pigula, Huang-Chiao Huang, Srivalleesha Mallidi, Sriram Anbil, Joyce Liu, Zhiming Mai, Tayyaba Hasan

**Table S1.** Cost comparison of using ultrasound and weight to generate growth curves.

Financial cost:

|                | <i>Ultrasound</i> |                |                | <i>Weight</i>   |                 |
|----------------|-------------------|----------------|----------------|-----------------|-----------------|
|                | Unit cost (\$)    | # of units     | Cost           | # of units      | Cost            |
| <i>Mice</i>    | \$70              | 54 mice        | \$3,780        | 432 mice        | \$30,240        |
| <i>Housing</i> | \$1.27            | 360 cage* days | \$457          | 1,620 cage*days | \$2,057         |
| <i>Total</i>   |                   |                | <b>\$4,237</b> |                 | <b>\$32,297</b> |

Time expense:

|                                              | <i>Ultrasound</i> |                     |                  | <i>Weight</i>  |                  |
|----------------------------------------------|-------------------|---------------------|------------------|----------------|------------------|
|                                              | Hours per unit    | # of units          | Person hours     | # of units     | Person hours     |
| <i>Tumor implantation</i>                    | 0.5               | 54 mice             | 27               | 432 mice       | 216              |
| <i>Treatments</i>                            | 1                 | 40 treatments       | 40               | 324 treatments | 324              |
| <i>Ultrasound monitoring &amp; analysis</i>  | 0.125             | 432 US measurements | 54               | 0              | 0                |
| <i>Sacrifice, harvesting, &amp; analysis</i> | 0.2               | 0                   | 0                | 432 mice       | 86               |
| <i>Total</i>                                 |                   |                     | <b>121 hours</b> |                | <b>626 hours</b> |

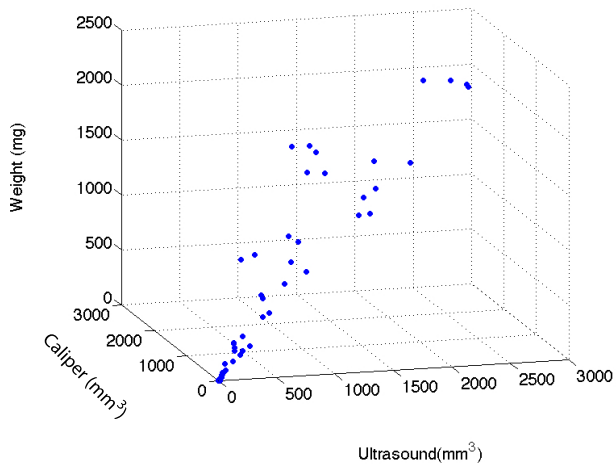

**Figure S1.** 3D plot of tumor sizes measured by ultrasound, calipers, and weight. Plotted in MatLab.

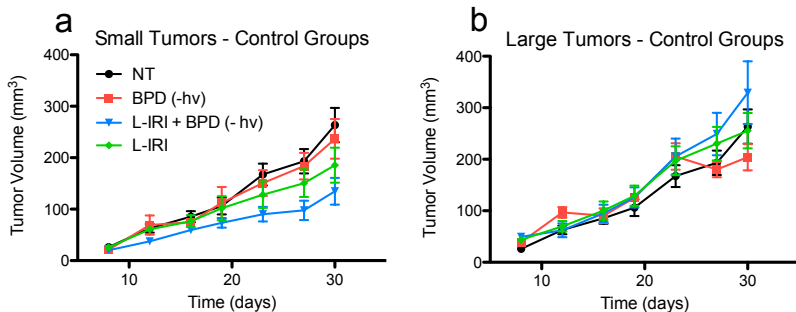

**Figure S2.** Longitudinal growth of large and small untreated tumors. No treatment curves presented in Figure 5 use the combined curve in blue here. Differences in size between large and small untreated tumors is statistically significant ( $P < 0.05$ ) only at day 8.

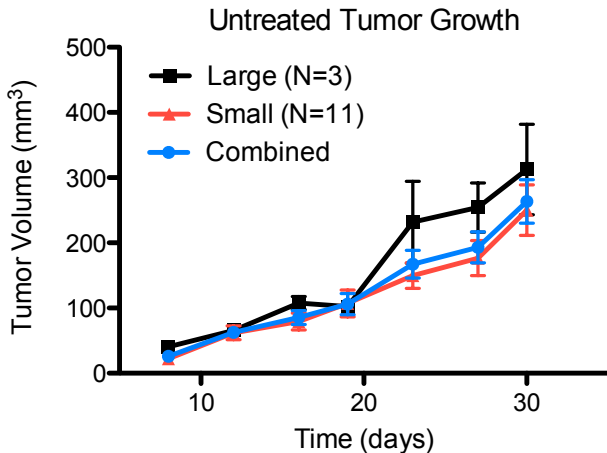

**Figure S3.** Longitudinal growth curves for BPD – no light control groups in large and small tumors. No statistically significant difference in tumor size are seen at any time point between BPD ( $-h\nu$ ) and NT or between L-IRI + BPD ( $-h\nu$ ) and L-IRI in either large or small tumors (two-tailed t-tests).

## Intraperson Variation

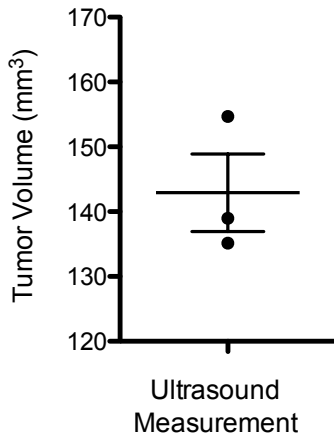

**Figure S4.** Intraperson variation of tumor volume measurements determined by ultrasound. The same tumor was independently measured 3 separate times over the course of a day. The mean volume was  $142.9 \text{ mm}^3 \pm 6.0 \text{ mm}^3$ .
